# Supplementary material for: Absence of Correlation between Chimeric RNA and Aging
Source: MDPI journal article supplement (doi:10.3390/genes8120386), 2017-12-14
Supplement: s1 [file s1]

# Supplementary Materials

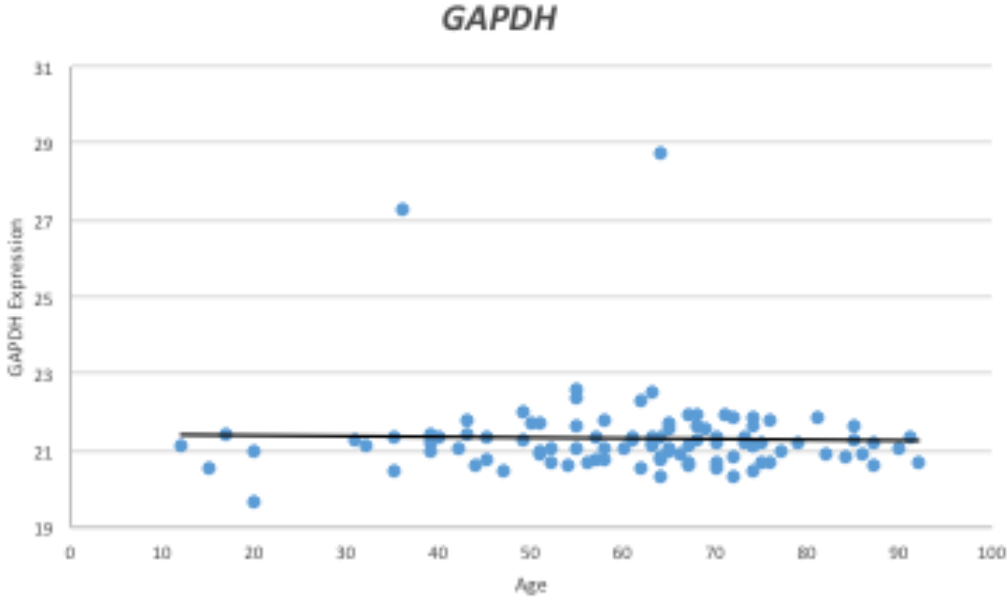

**Figure S1.** The absence of correlation of GAPDH with aging. *GAPDH* expression levels graphed against age with 101 samples.

**Table S1.** Age of the clinical samples used in Figures 3–5 and Figure S1.

| Sample | Age | Sample | Age | Sample | Age |
|--------|-----|--------|-----|--------|-----|
| 1      | 68  | 34     | 42  | 67     | 45  |
| 2      | 64  | 35     | 39  | 68     | 57  |
| 3      | 52  | 36     | 43  | 69     | 64  |
| 4      | 56  | 37     | 40  | 70     | 58  |
| 5      | 51  | 38     | 70  | 71     | 70  |
| 6      | 55  | 39     | 39  | 72     | 75  |
| 7      | 55  | 40     | 73  | 73     | 76  |
| 8      | 67  | 41     | 85  | 74     | 92  |
| 9      | 75  | 42     | 49  | 75     | 67  |
| 10     | 35  | 43     | 68  | 76     | 44  |
| 11     | 36  | 44     | 31  | 77     | 54  |
| 12     | 55  | 45     | 70  | 78     | 87  |
| 13     | 43  | 46     | 87  | 79     | 70  |
| 14     | 49  | 47     | 79  | 80     | 62  |
| 15     | 71  | 48     | 63  | 81     | 15  |
| 16     | 72  | 49     | 63  | 82     | 47  |
| 17     | 64  | 50     | 74  | 83     | 74  |
| 18     | 67  | 51     | 32  | 84     | 35  |
| 19     | 45  | 52     | 65  | 85     | 76  |
| 20     | 73  | 53     | 55  | 86     | 65  |
| 21     | 68  | 54     | 58  | 87     | 62  |
| 22     | 61  | 55     | 52  | 88     | 20  |
| 23     | 69  | 56     | 39  | 89     | 91  |
| 24     | 50  | 57     | 20  | 90     | 85  |
| 25     | 64  | 58     | 77  | 91     | 74  |
| 26     | 72  | 59     | 51  | 92     | 17  |
| 27     | 58  | 60     | 51  | 93     | 44  |
| 28     | 65  | 61     | 66  | 94     | 12  |
| 29     | 67  | 62     | 86  | 95     | 63  |
| 30     | 90  | 63     | 82  | 96     | 63  |
| 31     | 74  | 64     | 64  | 97     | 81  |
| 32     | 57  | 65     | 84  | 98     | 60  |
| 33     | 74  | 66     | 72  | 99     | 65  |
|        |     |        |     | 100    | 39  |
|        |     |        |     | 101    | 61  |
